# Supplementary material for: Three Months of Strength Training Changes the Gene Expression of Inflammation-Related Genes in PBMC of Older Women: A Randomized Controlled Trial
Source: MDPI journal article supplement (doi:10.3390/cells11030531), 2022-02-03
Supplement: s1 [file s1]

**Supplementary Table S1. Blood counts at baseline and after 3 months of resistance or flexibility training.**

|                                    |                 | IST<br>percentile |       |       | SET<br>percentile |       |       | CON<br>percentile |       |       |
|------------------------------------|-----------------|-------------------|-------|-------|-------------------|-------|-------|-------------------|-------|-------|
|                                    |                 | median            | 25th  | 75th  | median            | 25th  | 75th  | median            | 25th  | 75th  |
| <b>White blood cells (10e3/uL)</b> | <b>Baseline</b> | 5.90              | 5.33  | 8.12  | 6.51              | 5.33  | 6.79  | 6.28              | 5.50  | 6.57  |
|                                    | <b>3 months</b> | 5.60              | 4.85  | 6.99  | 6.60              | 5.27  | 6.95  | 6.59              | 5.42  | 8.50  |
|                                    | <b>p-value</b>  | 0.46              |       |       | 0.89              |       |       | 0.46              |       |       |
| <b>Neutrophils (%)</b>             | <b>Baseline</b> | 62.80             | 50.76 | 69.18 | 60.42             | 57.42 | 65.59 | 61.00             | 43.44 | 63.68 |
|                                    | <b>3 months</b> | 55.32             | 48.36 | 67.78 | 60.78             | 48.66 | 66.73 | 54.06             | 40.16 | 66.15 |
|                                    | <b>p-value</b>  | 0.71              |       |       | 0.50              |       |       | 0.47              |       |       |
| <b>Monocytes (%)</b>               | <b>Baseline</b> | 8.39              | 7.92  | 10.08 | 5.45              | 4.71  | 6.88  | 7.82              | 5.58  | 8.00  |
|                                    | <b>3 months</b> | 7.72              | 6.98  | 10.08 | 7.13              | 5.9   | 8.43  | 8.97              | 6.62  | 9.79  |
|                                    | <b>p-value</b>  | 0.72              |       |       | 0.22              |       |       | 0.07              |       |       |
| <b>Eosinophils (%)</b>             | <b>Baseline</b> | 1.43              | 0.6   | 1.99  | 2.77              | 0.79  | 4.01  | 4                 | 1.81  | 5.38  |
|                                    | <b>3 months</b> | 1.3               | 1.14  | 2.39  | 2.42              | 1.11  | 5.3   | 3.3               | 1.85  | 5.17  |
|                                    | <b>p-value</b>  | 0.58              |       |       | 0.69              |       |       | 0.46              |       |       |
| <b>Basophils (%)</b>               | <b>Baseline</b> | 0.37              | 0.27  | 0.5   | 0.58              | 0.39  | 0.8   | 0.79              | 0.56  | 1.41  |
|                                    | <b>3 months</b> | 0.74              | 0.23  | 0.98  | 0.35              | 0.15  | 0.89  | 0.52              | 0.4   | 1.4   |
|                                    | <b>p-value</b>  | 0.14              |       |       | 0.5               |       |       | 0.27              |       |       |
| <b>Lymphocytes (%)</b>             | <b>Baseline</b> | 26.05             | 21.65 | 38.03 | 29.4              | 26.9  | 33.2  | 28.7              | 24.2  | 43.63 |
|                                    | <b>3 months</b> | 33.55             | 22.35 | 41.08 | 29.8              | 25.1  | 37.5  | 34.2              | 21.68 | 45.75 |
|                                    | <b>p-value</b>  | 0.46              |       |       | 0.69              |       |       | 0.72              |       |       |
| <b>CD3 cells (10e3/uL)</b>         | <b>Baseline</b> | 1.06              | 0.88  | 1.21  | 1.02              | 0.79  | 1.53  | 0.93              | 0.76  | 1.47  |
|                                    | <b>3 months</b> | 1.15              | 0.84  | 1.61  | 1.29              | 0.83  | 1.61  | 1.18              | 0.81  | 1.73  |
|                                    | <b>p-value</b>  | 0.13              |       |       | 0.50              |       |       | 1.00              |       |       |
| <b>CD8+ T-cells (10e3/uL)</b>      | <b>Baseline</b> | 0.44              | 0.32  | 0.60  | 0.29              | 0.26  | 0.43  | 0.29              | 0.15  | 0.45  |
|                                    | <b>3 months</b> | 0.52              | 0.34  | 0.68  | 0.34              | 0.22  | 0.58  | 0.42              | 0.21  | 0.48  |
|                                    | <b>p-value</b>  | 0.72              |       |       | 0.50              |       |       | 0.50              |       |       |
| <b>CD8+CD28+CD57- (naïve, %)</b>   | <b>Baseline</b> | 38.10             | 18.95 | 63.48 | 29.80             | 28.05 | 50.80 | 70.10             | 46.90 | 78.10 |
|                                    | <b>3 months</b> | 36.60             | 21.55 | 62.38 | 42.00             | 29.75 | 48.05 | 70.90             | 46.35 | 77.60 |
|                                    | <b>p-value</b>  | 0.72              |       |       | 0.50              |       |       | 0.50              |       |       |
| <b>CD8+CD28-CD57- (memory, %)</b>  | <b>Baseline</b> | 45.70             | 32.23 | 70.05 | 40.30             | 34.55 | 61.40 | 20.00             | 16.35 | 33.65 |
|                                    | <b>3 months</b> | 54.55             | 28.15 | 75.18 | 52.20             | 35.95 | 56.80 | 21.50             | 19.65 | 35.80 |
|                                    | <b>p-value</b>  | 0.72              |       |       | 0.89              |       |       | 0.14              |       |       |
| <b>CD8+CD57+ (%)</b>               | <b>Baseline</b> | 5.05              | 4.30  | 22.23 | 16.10             | 5.35  | 26.80 | 5.20              | 3.05  | 24.45 |
|                                    | <b>3 months</b> | 8.00              | 3.30  | 10.38 | 9.40              | 3.80  | 23.85 | 2.60              | 1.10  | 22.05 |
|                                    | <b>p-value</b>  | 1.00              |       |       | 0.50              |       |       | 0.23              |       |       |
| <b>CD8+CD28-CD57+ (SPC, %)</b>     | <b>Baseline</b> | 4.95              | 4.13  | 21.90 | 15.90             | 5.25  | 26.15 | 5.10              | 2.00  | 20.40 |
|                                    | <b>3 months</b> | 7.70              | 3.28  | 10.10 | 9.20              | 3.60  | 23.75 | 1.70              | 1.10  | 18.90 |
|                                    | <b>p-value</b>  | 1.00              |       |       | 0.50              |       |       | 0.22              |       |       |
| <b>CD8+CD28+CD57+ (SPC, %)</b>     | <b>Baseline</b> | 0.15              | 0.10  | 0.35  | 0.20              | 0.10  | 0.65  | 1.10              | 0.55  | 4.05  |
|                                    | <b>3 months</b> | 0.15              | 0.03  | 0.43  | 0.20              | 0.10  | 0.20  | 0.90              | 0.00  | 3.15  |
|                                    | <b>p-value</b>  | 1.00              |       |       | 0.46              |       |       | 0.13              |       |       |

|                                   |                 | <i>IST</i><br>percentile |             |             | <i>SET</i><br>percentile |             |             | <i>CON</i><br>percentile |             |             |
|-----------------------------------|-----------------|--------------------------|-------------|-------------|--------------------------|-------------|-------------|--------------------------|-------------|-------------|
|                                   |                 | <i>median</i>            | <i>25th</i> | <i>75th</i> | <i>median</i>            | <i>25th</i> | <i>75th</i> | <i>median</i>            | <i>25th</i> | <i>75th</i> |
| <b>CD8- T-cells (10e3/uL)</b>     | <b>Baseline</b> | 0.61                     | 0.55        | 0.62        | 0.77                     | 0.45        | 1.16        | 0.76                     | 0.51        | 1.06        |
|                                   | <b>3 months</b> | 0.63                     | 0.50        | 0.93        | 0.85                     | 0.57        | 1.12        | 0.88                     | 0.48        | 1.25        |
|                                   | <b>p-value</b>  | 0.47                     |             |             | 0.50                     |             |             | 1.00                     |             |             |
| <b>CD8-CD28+CD57- (naïve, %)</b>  | <b>Baseline</b> | 93.85                    | 86.73       | 96.63       | 94.40                    | 89.60       | 96.50       | 99.20                    | 91.90       | 99.70       |
|                                   | <b>3 months</b> | 93.85                    | 87.63       | 97.15       | 94.80                    | 92.45       | 96.85       | 99.30                    | 91.55       | 99.65       |
|                                   | <b>p-value</b>  | 0.29                     |             |             | 0.69                     |             |             | 0.85                     |             |             |
| <b>CD8-CD28-CD57- (memory, %)</b> | <b>Baseline</b> | 4.40                     | 2.63        | 9.85        | 4.50                     | 2.15        | 6.20        | 0.70                     | 0.20        | 2.30        |
|                                   | <b>3 months</b> | 4.80                     | 1.88        | 10.65       | 4.50                     | 1.95        | 6.30        | 0.50                     | 0.20        | 3.00        |
|                                   | <b>p-value</b>  | 1.00                     |             |             | 0.89                     |             |             | 0.29                     |             |             |
| <b>CD8-CD57+ (SPC, %)</b>         | <b>Baseline</b> | 2.05                     | 0.45        | 3.43        | 1.90                     | 0.65        | 4.40        | 0.20                     | 0.05        | 5.70        |
|                                   | <b>3 months</b> | 1.45                     | 0.68        | 1.85        | 0.90                     | 0.55        | 1.70        | 0.20                     | 0.05        | 5.45        |
|                                   | <b>p-value</b>  | 0.47                     |             |             | 0.18                     |             |             | 0.66                     |             |             |
| <b>CD8-CD28-CD57+ (SPC, %)</b>    | <b>Baseline</b> | 2.00                     | 0.38        | 3.33        | 0.80                     | 0.60        | 4.35        | 0.10                     | 0.00        | 4.30        |
|                                   | <b>3 months</b> | 1.35                     | 0.58        | 1.75        | 0.90                     | 0.30        | 1.45        | 0.10                     | 0.00        | 4.05        |
|                                   | <b>p-value</b>  | 0.47                     |             |             | 0.23                     |             |             | 0.66                     |             |             |
| <b>CD8-CD28+CD57+ (SPC, %)</b>    | <b>Baseline</b> | 0.10                     | 0.03        | 0.10        | 0.10                     | 0.00        | 0.60        | 0.10                     | 0.05        | 1.40        |
|                                   | <b>3 months</b> | 0.10                     | 0.10        | 0.10        | 0.10                     | 0.05        | 0.40        | 0.10                     | 0.05        | 1.40        |
|                                   | <b>p-value</b>  | 0.32                     |             |             | 0.66                     |             |             | 1.00                     |             |             |

IST = intensive strength training; SET = strength-endurance training, CON = control, SPC = senescence-prone cells; the values denote median (interquartile range); phenotype frequencies were expressed as percentages within the CD3+CD8+ or CD3+CD8- T-cells. P-values based on Wilcoxon Signed Rank test
